# Crystal Structure of the Sema-PSI Extracellular Domain of Human RON Receptor Tyrosine Kinase

Kinlin L. Chao<sup>1</sup>, I-Wei Tsai<sup>1</sup>, Chen Chen<sup>1</sup>, Osnat Herzberg<sup>1,2\*</sup>

**1** Institute for Bioscience and Biotechnology Research, University of Maryland, Rockville, Maryland, United States of America, **2** Department of Chemistry and Biochemistry, University of Maryland, College Park, Maryland, United States of America

## Abstract

Human RON (Recepteur d'Origine Nantais) receptor tyrosine kinase is a cell surface receptor for Macrophage Stimulating Protein (MSP). RON mediates signal transduction pathways that regulate cell adhesion, invasion, motility and apoptosis processes. Elevated levels of RON and its alternatively spliced variants are implicated in the progression and metastasis of tumor cells. The binding of MSP  $\alpha/\beta$  heterodimer to the extracellular region of RON receptor induces receptor dimerization and activation by autophosphorylation of the intracellular kinase domains. The ectodomain of RON, containing the ligand recognition and dimerization domains, is composed of a semaphorin (Sema), Plexins-Semaphorins-Integrins domain (PSI), and four Immunoglobulins-Plexins-Transcription factor (IPT) domains. High affinity association between MSP and RON is mediated by the interaction between MSP  $\beta$ -chain and RON Sema, although RON activation requires intact RON and MSP proteins. Here, we report the structure of RON Sema-PSI domains at 1.85 Å resolution. RON Sema domain adopts a seven-bladed  $\beta$ -propeller fold, followed by disulfide bond rich, cysteine-knot PSI motif. Comparison with the homologous Met receptor tyrosine kinase reveals that RON Sema-PSI contains distinguishing secondary structural features. These define the receptors' exclusive selectivity towards their respective ligands, RON for MSP and Met for HGF. The RON Sema-PSI crystal packing generates a homodimer with interface formed by the Sema domain. Mapping of the dimer interface using the RON homology to Met, MSP homology to Hepatocyte Growth Factor (HGF), and the structure of the Met/HGF complex shows the dimer interface overlapping with the putative MSP  $\beta$  binding site. The crystallographically determined RON Sema-PSI homodimer may represent the dimer assembly that occurs during ligand-independent receptor activation and/or the inhibition of the constitutive activity of RON $\Delta$ 160 splice variant by the soluble RON splice variant, RON $\Delta$ 85.

**Citation:** Chao KL, Tsai I-W, Chen C, Herzberg O (2012) Crystal Structure of the Sema-PSI Extracellular Domain of Human RON Receptor Tyrosine Kinase. PLOS ONE 7(7): e41912. doi:10.1371/journal.pone.0041912

**Editor:** Joel L. Sussman, Weizmann Institute of Science, Israel

**Received:** May 14, 2012; **Accepted:** June 29, 2012; **Published:** July 25, 2012

**Copyright:** © 2012 Chao et al. This is an open-access article distributed under the terms of the Creative Commons Attribution License, which permits unrestricted use, distribution, and reproduction in any medium, provided the original author and source are credited.

**Funding:** This work was supported by National Institutes of Health (NIH) grant R01-GM087922 (URL: <http://grants.nih.gov/grants/oer.htm>). The funders had no role in study design, data collection and analysis, decision to publish, or preparation of the manuscript.

**Competing Interests:** The authors have declared that no competing interests exist.

\* E-mail: [osnat@umd.edu](mailto:osnat@umd.edu)

## Introduction

Human RON (Recepteur d'Origine Nantais) receptor tyrosine kinase is the specific cell-surface receptor for Macrophage Stimulating Protein (MSP), a serum growth factor also known as the Hepatocyte Growth Factor-like protein (HGFL). RON, encoded by the *MST1R* gene, is a member of the Class VI receptor tyrosine kinase family (EC:2.7.10.1) along with the proto-oncogene Met receptor tyrosine kinase (Met). The extracellular regions and the cytoplasmic kinase domains of RON and Met share 33% and 64% amino acid sequence identities, respectively [1]. RON is widely expressed in macrophages, epithelial tissues, adenocarcinoma cells, bronchial epithelial cells, granulocytes, and monocytes [2,3,4]. The interaction of RON with MSP transduces multiple signaling pathways that regulate cellular morphogenesis, adhesion, invasion and motility [5]. RON is also associated with the MSP-mediated inflammatory activities upon cellular stresses and with innate immune responses to bacterial infections [6,7,8]. High levels of RON are detected in patients with ulcerative colitis and deep endometriosis and also in several types of epithelial cancers, implicating RON in tumor progressions and cancer pathogenesis [5,9,10,11]. In addition, alternatively spliced variants of RON promote the metastasises of lung, breast, colon, ovarian,

prostate, pancreatic, thyroid and gastric cancers [12,13,14,15,16,17,18,19,20]. Thus, RON has become an important target for cancer therapy using anti-RON monoclonal antibodies, small molecule kinase inhibitors, and small interfering RNAs [21,22,23].

RON comprises an extracellular ligand binding domain (ectodomain), a single pass trans-membrane segment and a cytoplasmic tyrosine kinase domain. The ectodomain can be subdivided into the N-terminal semaphorin (Sema) domain, a small cysteine-rich Plexins-Semaphorins-Integrins (PSI) motif, and four Immunoglobulins-Plexins-Transcription factor (IPT) domains. Cellular RON is produced as a glycosylated, single chain precursor (Pro-RON), which undergoes a furin protease cleavage at Arg309–Gly310 in the Sema domain prior to its transport from the Golgi to the apical surface of the cell [4,23]. This disulfide-linked heterodimer is the mature form of RON. RON  $\alpha$ -chain contains the N-terminal half of the Sema domain (~40 kDa) and the  $\beta$ -chain (145 kDa) consists of the second half of the Sema domain, the PSI motif, the four IPT units, the transmembrane region and the cytoplasmic kinase domain. The current model for the MSP-mediated activation of RON begins with the binding of MSP to the receptor, leading to the formation of signaling-competent 2:2 MSP:RON complex on the cell surface. RON

dimerization then promotes the autophosphorylation of the functional tyrosine residues *in trans*, and the up regulation of the intrinsic kinase activity [7,24,25]. The phosphorylated kinase domains provide docking sites for cytoplasmic adaptor and signal transducer proteins to initiate downstream signaling cascades [7,24]. Some of these signal transduction pathways involve the participations of *ras*/mitogen activated protein kinase (MAPK), phosphatidylinositol-3 kinase (PI-3K)/Akt, focal adhesion kinase (FAK), and  $\beta$ -catenin proteins [5,26].

The RON specific ligand, MSP, is a serum protein that stimulates the chemotaxis of mouse peritoneal resident macrophages when exposed to the endotoxin-activated serum [7,27]. Liver hepatocytes produce a single chain precursor MSP (Pro-MSP), which circulates in blood as biologically inactive scatter factor [28]. Under cellular stress, pro-MSP is cleaved by a type II transmembrane serine proteases, matriptase and hepsin, at Arg483-Val484 to produce the biologically active, disulfide-linked MSP  $\alpha/\beta$  heterodimer [29,30]. MSP belongs to the plasminogen-like growth factor family along with Hepatocyte Growth Factor (HGF), the specific ligand of Met. The two ligands share 43% amino acid sequence identity [31]. The 50 kDa MSP  $\alpha$ -chain (MSP $\alpha$ ) contains a N-terminal domain and four Kringle domains. The 30 kDa  $\beta$ -chain (MSP $\beta$ ) adopts a chymotrypsin-like serine-protease fold [7,31,32] but lacks the catalytic triad of serine proteases, and accordingly, is devoid of proteolytic activity (the catalytic triad counterparts in MSP are Gln522, Gln568, and Tyr661) [32]. Pro-MSP exhibits no binding affinity to RON, whereas the mature MSP  $\alpha/\beta$  binds to RON and stimulates the autophosphorylation of tyrosine residues located on the intracellular kinase domain [28]. Both  $\alpha$  and  $\beta$  chains of MSP heterodimer are required for RON activation since MSP $\alpha$  or MSP $\beta$  alone are incapable of receptor induction [28,33,34]. Cell-based binding studies showed similar binding affinities of RON to MSP  $\alpha/\beta$  heterodimer and to MSP $\beta$  alone ( $EC_{50} \sim 0.20$  nM), indicating that MSP $\beta$  contains the high affinity binding site for RON [33]. Surface Plasmon Resonance studies determined a dissociation constant of  $\sim 13$  nM between RON full-length extracellular domain and MSP $\beta$  [35]. The ability of RON Sema domain to compete with the membrane-bound, full length RON in binding to MSP $\beta$  suggested that the MSP $\beta$  binding site is localized on the Sema domain [36]. The cell based binding and competition assays also showed that MSP $\alpha$  binds to RON with  $\sim 100$ -fold lower affinity than that of MSP $\beta$  ( $EC_{50} = 17$  nM) [33,34,36]. Without MSP $\beta$ , MSP $\alpha$  has weak or no affinity for full-length RON, RON Sema, and RON $\Delta 85$  splice variant containing only the Sema and PSI domains [16,34]. However, it remains unknown whether MSP $\alpha$  interacts with any of the RON IPT domains.

In addition to MSP, co-immunoprecipitation and co-localization experiments suggest that RON has other partner proteins. It forms heterodimers with Met, plexin B1–B3,  $\beta 1$  integrin, and epidermal growth factor receptor (EGFR). These interactions control cellular adhesion, migration and invasion processes [37,38,39,40,41,42,43]. For example, RON/EGFR complex can migrate from the cell surface to the nucleus to act as a transcriptional regulator in human bladder cancer cells [44]. RON also associates with several hyaluronan binding proteins. RON/hyaluronidase 2 complex on the cell surface prevents RON's participation in retroviral transformation of human bronchial epithelial cells [45,46]. The v6 splice variant of the hyaluronan receptor CD44 associates with RON/MSP during the migration of human colon adenocarcinoma cells, and another hyaluronan receptor, RHAMM (Receptor for Hyaluronic Acid-Mediated

Motility) was co-localized with RON at the apical surface of ciliated cells in response to oxidative stress [47,48].

Despite a wide range of cellular responses regulated by RON, the basic mechanisms by which MSP and other protein partners mediate RON's activity are unknown at atomic detail. Here, we report the crystal structure of RON Sema-PSI domains at 1.85 Å. The structure reveals unique MSP specificity determinants. It also suggests possible mechanisms for the ligand-independent RON dimerization, which occurs at high RON expression levels and with RON $\Delta 160$  splice variant, present in a wide range of human tumors and tumor-derived epithelial cell lines [23,49].

## Materials and Methods

### Cloning, Expression and Protein Purification

The human *MSTIR* gene was amplified from pMSCVneo-hRON-2HA, (kindly provided by Dr. Pamela A. Hankey, Penn State University) and was ligated into the BglIII/AgeI digested pMT/BiP/V5-HisA vector for the secreted RON Sema-PSI-IPT<sub>1</sub> production in the *Drosophila* Expression System (Invitrogen). The furin cleavage site in the RON Sema domain (KRRRRGA) was mutated to a thrombin cleavage site (KLVPRGS). The recombinant RON Sema-PSI-IPT<sub>1</sub> protein spans residues Glu25–Glu683 along with two N-terminal residues (Arg23 and Ser24) and two C-terminal residues (Thr684, Gly685) followed by a His<sub>6</sub>-tag, (His686–His691), derived from the expression vector. Sequencing revealed the presence of the mutation Arg322Gln due to single nucleotide polymorphism. *Drosophila melanogaster* Schneider 2 (S2; Invitrogen) cells were cotransfected with the RON expression vector and pCoPuro, and the stable transfectants resistant to puromycin were selected. Clonal selection of stable transfectants was conducted to obtain clones with high protein expression levels. RON protein, secreted into the conditioned serum free media (HyClone SFX), was detected by Western analysis using the C-terminal specific Penta-His monoclonal Antibody (Qiagen). For large-scale preparation, stable S2 cells were grown in shaker flasks at 28°C and protein production was induced by the addition of 0.6 mM CuSO<sub>4</sub>. After 4–5 days, S2 cells were removed by centrifugation and the conditioned medium was applied directly onto a Chelating Sepharose Fast Flow column (GE Health Sciences) (Lehr et al., 2000). His<sub>6</sub>-tagged RON protein was eluted with 50 mM Tris-HCl, (pH 8.0) containing 50–500 mM imidazole. RON Sema-PSI-IPT<sub>1</sub> was further purified by 40% and 80% ammonium sulfate precipitation steps. Sephacryl S200 size exclusion chromatography equilibrated in 50 mM Tris-HCl, pH 8.0, 0.1 M NaCl, 0.5 mM EDTA (GE Health Sciences) was used to remove ammonium sulfate and contaminants. Protein concentration was determined using a calculated extinction coefficient value of 44,485 M<sup>-1</sup> cm<sup>-1</sup> at 280 nm. The yield was  $\sim 1.7$  mg purified protein per 1 L media. The matrix-assisted laser desorption time-of-flight (MALDI-TOF) mass spectrometry analysis showed the molecular mass of 77,114 $\pm$ 91 Da,  $\sim 5206$  Da higher than the calculated molecular mass of 71,908 Da, consistent with the five predicted N-glycosylation sites, four in the Sema and one in the IPT<sub>1</sub> domain. Assuming uniform glycosylation, the average sugar mass per site is  $\sim 1,041$  Da, within the range for a simple 5-unit biantennary carbohydrate reported to be commonly synthesized in *Drosophila* S2 cells [50]. The RON Sema-PSI-IPT<sub>1</sub> was cleaved with thrombin at 1000:1 substrate:enzyme molar ratio for 16 hours at 22°C to obtain a disulfide-linked RON  $\alpha/\beta$  heterodimer. Thrombin was removed from the proteolysis reaction by affinity chromatography using Benzimidazole Sepharose resin (GE Health Sciences). The mature RON  $\alpha/\beta$  migrated on the SDS-

PAGE as a single chain under non-reducing condition, while it ran as the 30 kDa  $\alpha$ - and 50 kDa  $\beta$ -chains under reducing conditions.

## Crystallization, Data Collection, and Structure Determination

Crystals were obtained at room temperature by the hanging drop or sitting drop vapor diffusion methods. Equal volumes of 7.1 mg/mL RON Sema-PSI-IPT<sub>1</sub> sample and mother liquor containing 0.1 M sodium acetate (pH 4.6), 19% (v/v) polyethylene glycol (PEG) 4000, 0.2 M ammonium sulfate (derived from the Hampton Crystal Screen I condition 20) were dispensed, and the drops were equilibrated against the reservoir solution. Both the single chain and thrombin-cleaved RON Sema-PSI-IPT<sub>1</sub> formed crystals under identical condition. For data collection, plate-like RON Sema-PSI-IPT<sub>1</sub> crystals were transferred to mother liquor supplemented with 30% (v/v) glycerol and flash-cooled at 100° K in liquid propane cooled in liquid nitrogen. Diffraction data for the single chain RON Sema-PSI-IPT<sub>1</sub> were collected at the General Medicine and Cancer Institutes Collaborative Access Team (GM/CA-CAT) micro-beamline at the Advanced Photon Source (Argonne National Laboratory, Argonne, IL), which was equipped with a MARmosaic CCD detector. The data were processed with the XDS (Table 1) [51]. Diffraction data for the thrombin-cleaved RON crystal were collected in-house and processed with d\*TREK [52]. The crystals of the single chain and cleaved RONs were isomorphous belonging to the space group C2 with one molecule per asymmetric unit and solvent content of 55.3%.

The structure was determined by Molecular Replacement using PHASER [53] as implemented in CCP4, with the Met Sema domain (PDB entry code 2UZK) as the search model [54]. Model rebuilding and structure refinement were carried out using the programs Coot [55], and REFMAC5 [56]. Water molecules were assigned using peaks in the  $F_o - F_c$  difference Fourier map with electron density  $>3\sigma$  as the acceptance criteria. As the diffraction resolution of the single chain RON crystal was superior to that of the thrombin-cleaved RON Sema-PSI (1.85 Å and 2.5 Å resolution, respectively), the refinement results are provided for the intact RON structure (Table 1). The coordinates and structure factors have been deposited in the Protein Data Bank (entry code 4FWW).

Molecular interfaces were calculated using the PISA server [57] and figures were prepared with PyMOL (DeLano Scientific, CA), MOLSCRIPT [58] and RASTER3D [59].

## Results and Discussion

### Characterization of the Purified RON and RON in the Crystals

The purified RON Sema-PSI-IPT<sub>1</sub> has a molecular mass of 77,114±91 Da, consistent with the five predicted glycosylation sites. The electron density map, however, accounted only for the Sema and PSI domains. SDS-PAGE analysis of the crystals suggested degradation of the protein during crystallization. The mass spectrometry analysis of RON crystals revealed a major peak of 65,616±235 Da. Crystal packing positions Val42 as the first residue seen in the electron density map. Val42 is located in a highly crowded environment with no space to accommodate the preceding amino acids. The lower than expected molecular weight and the arrangement in the crystal suggest a proteolytic cleavage of the 17 N-terminal residues. Moreover, western analysis of RON crystals showed a truncated protein that was not recognized by the C-terminal specific Penta-His

antibody, indicating additional loss of C-terminal residues. Thus, a second proteolytic cleavage site occurred in the IPT<sub>1</sub> domain. Accounting for the loss of the 17 N-terminal residues, the difference between the calculated and experimentally determined molecular mass implies the degradation of approximately 75 of the 115 IPT<sub>1</sub> residues. No electron density was associated with these remaining IPT<sub>1</sub> residues and accordingly, they were not modeled. The *Drosophila* S2 cells produce at least four acid active cathepsins [60], and trace amounts of contaminating proteases in the RON Sema-PSI-IPT<sub>1</sub> preparation could cleave the protein at the low pH (4.6) of the crystal growth solution. In contrast, the RON Sema-PSI-IPT<sub>1</sub> protein remained intact when stored at pH 8.0. However, the loss of the C-terminal residues of IPT<sub>1</sub> during crystallization may be related to the trypsin-sensitive Lys632-Lys633 peptide bond of IPT<sub>1</sub> [49]. Ma and colleagues concluded that the susceptibility of RON IPT<sub>1</sub> to the cell-associated trypsin-like proteases regulates RON mediated tumorigenic activities in epithelial cells.

### Structure Determination

The Molecular Replacement yielded a single solution for the RON Sema domain with the rotation and translation function Z-scores of 10.8 and 9.6, respectively. However, various Molecular Replacement searches with the Met PSI domain did not yield a correct solution. The initial model for the RON PSI domain was obtained by manual fitting of the Met PSI domain into the electron density map, and then modifying the main chain and side chains as required. There is one RON sema-PSI molecule per asymmetric unit. The loop that encompasses the thrombin cleavage site was disordered in both the single-chain and thrombin-cleaved RON Sema-PSI proteins. Overall, the RON Sema-PSI model contains amino acids Val42–Pro568 (Figure 1A) except for nine Sema residues encompassing the disordered thrombin cleavage site (Leu306–Gly314) and four loop residues (Asp355–Pro358). Of the four predicted RON Sema N-glycosylation sites (Asn66, Asn419, Asn458, and Asn488), only the Asn488 N-glycan was visible in the electron density map, consistent with a branched biantennary oligosaccharide Man $\alpha$ (1,3)Man $\beta$ (1,4)GlcNAc $\beta$ (1,4)GlcNAc.

### Overall Structure

The RON Sema domain adopts the seven-bladed  $\beta$ -propeller fold, found in Met, semaphorins and plexin receptors (Figure 1A) [61,62,63]. The DALI program [64,65] identified the Met Sema domain (PDB code 1SHY) as the closest to the RON Sema domain, with Z = 41.1 and root mean square deviation (RMSD) of 3.1 Å for 462 C $\alpha$  atoms. More distant structural homologues of RON Sema include the plexin receptors and semaphorins [66]. RON Sema contains hallmark features of the Sema-type  $\beta$ -propeller. These features include a large insertion, termed extrusion, in the 5<sup>th</sup> blade and deviations from four antiparallel  $\beta$  strands, characteristic of the individual  $\beta$ -sheets in the  $\beta$ -propeller fold [67,68,69]. In RON and Met Sema domains, blade 5 of the  $\beta$ -propeller contains three  $\beta$ -strands (strands A–C) and blades 4 and 6 contain five  $\beta$ -strands (strands A–E) with strand A being the innermost  $\beta$ -strand at the center of  $\beta$ -propeller (Figure 1A). The N-terminal residues (Val42–Tyr44) provide the 5<sup>th</sup>  $\beta$ -strand ( $\beta$ 6E) of blade 6. The extrusion regions in blade 5 vary both in sequence and length in different Sema-type  $\beta$ -propellers, ranging from 57 residues in Met to 77 residues in Sema4D [68]. In RON, the 62-residue insertion (Pro370–Ser432) is located between  $\beta$ -strands 5C and 4E (Figure 2), and it forms a 16-residue helix ( $\alpha$ EX1), followed by a long loop that packs tightly against the outermost 4E (Figure 1A). Structural integrity of

**Table 1.** Data collection and refinement statistics.

| <b>Data collection</b>                                           |                                                                        |
|------------------------------------------------------------------|------------------------------------------------------------------------|
| Space group                                                      | C2                                                                     |
| Resolution (Å)                                                   | 19.3–1.85 (1.90–1.85)                                                  |
| Cell dimension (Å)                                               | a = 106.4, b = 73.3, c = 87.9, $\alpha = \gamma = 90$ , $\beta = 97.4$ |
| Wavelength (Å)                                                   | 1.0332                                                                 |
| No. molecules in the asymmetric unit                             | 1                                                                      |
| No. observed reflections                                         | 144,495                                                                |
| No. unique reflections                                           | 51,510                                                                 |
| Completeness (%) <sup>a</sup>                                    | 89.9 (63.7)                                                            |
| Multiplicity                                                     | 2.8 (2.0)                                                              |
| $R_{\text{merge}}^b$                                             | 0.069 (0.44)                                                           |
| $\langle I/\sigma \rangle$                                       | 10.46 (1.47)                                                           |
| <b>Refinement</b>                                                |                                                                        |
| Resolution range (Å)                                             | 19.3–1.85                                                              |
| No. of reflections                                               | 48,882                                                                 |
| Completeness (%)                                                 | 90.0                                                                   |
| $R_{\text{factor}}^c/R_{\text{free}}^d$                          | 0.191/0.232                                                            |
| No. protein atoms                                                | 3845                                                                   |
| No. of waters                                                    | 358                                                                    |
| No. of sugar units                                               | 4                                                                      |
| No. of ethylene glycol, PEG fragment, acetate, sulfate, glycerol | 5, 1, 6, 2, 4                                                          |
| <b>Root Mean Square Deviation from ideal geometry</b>            |                                                                        |
| Bond length (Å)                                                  | 0.012                                                                  |
| Bond angles (°)                                                  | 1.55                                                                   |
| <b>Ramachandran plot (%)</b>                                     |                                                                        |
| Allowed                                                          | 99.5                                                                   |
| Disallowed                                                       | 0.5                                                                    |

<sup>a</sup>The values in parentheses are for the highest resolution shell, 1.85 Å.

<sup>b</sup> $R_{\text{merge}} = \sum_{hkl} [(\sum_j |I_j - \langle I \rangle|) / \sum_j |I_j|]$ .

<sup>c</sup> $R_{\text{factor}} = \sum_{hkl} (|F_o| - |F_c|) / \sum_{hkl} |F_o|$ , where  $F_o$  and  $F_c$  are the observed and calculated structure factors, respectively.

<sup>d</sup> $R_{\text{free}}$  is computed from randomly selected 2,628 reflections and omitted from the refinement.

doi:10.1371/journal.pone.0041912.t001

this long loop is maintained by two adjacent disulfide bonds (Cys385–Cys407 and Cys386–Cys422) and by stacking of aromatic groups (Phe400 of the extrusion and Tyr245 of  $\alpha$ -helix 3D of the core Sema domain). Electrostatic potential analysis showed that the top surface of the  $\beta$ -propeller barrel, corresponding to loop segments connecting the  $\beta$ -strands BC and DA, and the sides of the barrel are neutral. In contrast, the bottom surface of the  $\beta$ -propeller barrel, corresponding to loop segments connecting the AB and CD  $\beta$ -strands is negatively charged (Figure 1B). The pronounced negatively charged surface suggests interaction with a positively charged region of a counterpart protein.

A small, cysteine-rich PSI motif follows the Sema domains of both RON and Met receptor tyrosine kinases. PSI modules, found in the extracellular domains of over 1,600 structurally and functionally related receptor proteins, serve as hinges to orient the preceding and ensuing domains for proper receptor-ligand interactions [70]. The PSI motifs of RON and Met adopt a cysteine-knot fold consisting of two small antiparallel  $\beta$ -sheets and four short  $\alpha$ -helices (Figure 1A). RON PSI contains 8 conserved cysteines, which form four disulfide linkages (Cys527–Cys545, Cys536–Cys552, Cys548–Cys558, and Cys533–Cys567

in RON sequence). A DALI alignment of the RON and Met PSI domains yielded  $Z = 8.0$  and  $\text{RMSD} = 1.5$  Å for 44 paired C $\alpha$  atoms. RON PSI motif shows a negatively charged surface on one side as it extends from RON Sema's bottom surface (Figure 1B, right panel), while positive charged residues populate the opposite surface of the PSI motif (Figure 1B, left panel). The interdomain contact area between the RON Sema and PSI domains embeds  $\sim 385$  Å<sup>2</sup> surface area. The small interaction surface is consistent with a flexible module that mediates the conformational transition of multi-domain cell surface receptors.

### Comparison with Met Sema-PSI Structure

The RON and Met extracellular domains share  $\sim 35\%$  sequence identity. A structure-based sequence alignment of RON and Met Sema-PSI shows that, by and large, the secondary structural elements are conserved (Figure 2). The loops connecting the secondary structure elements are less conserved and contain multiple insertions and deletions. RON Sema loops contains  $\alpha$ -helices that are absent in Met ( $\alpha 1D$ ,  $\alpha 2B$ ,  $\alpha 3B$  and  $\alpha Ex2$ ; Figure 2), while the Met Sema loops have two  $\beta$ -strands that are absent in RON ( $\beta 1D'$  and  $\beta 3D$ ; Figure 2). The superposed structures show that the core  $\beta$ -sheets of the RON and Met  $\beta$ -propellers are well

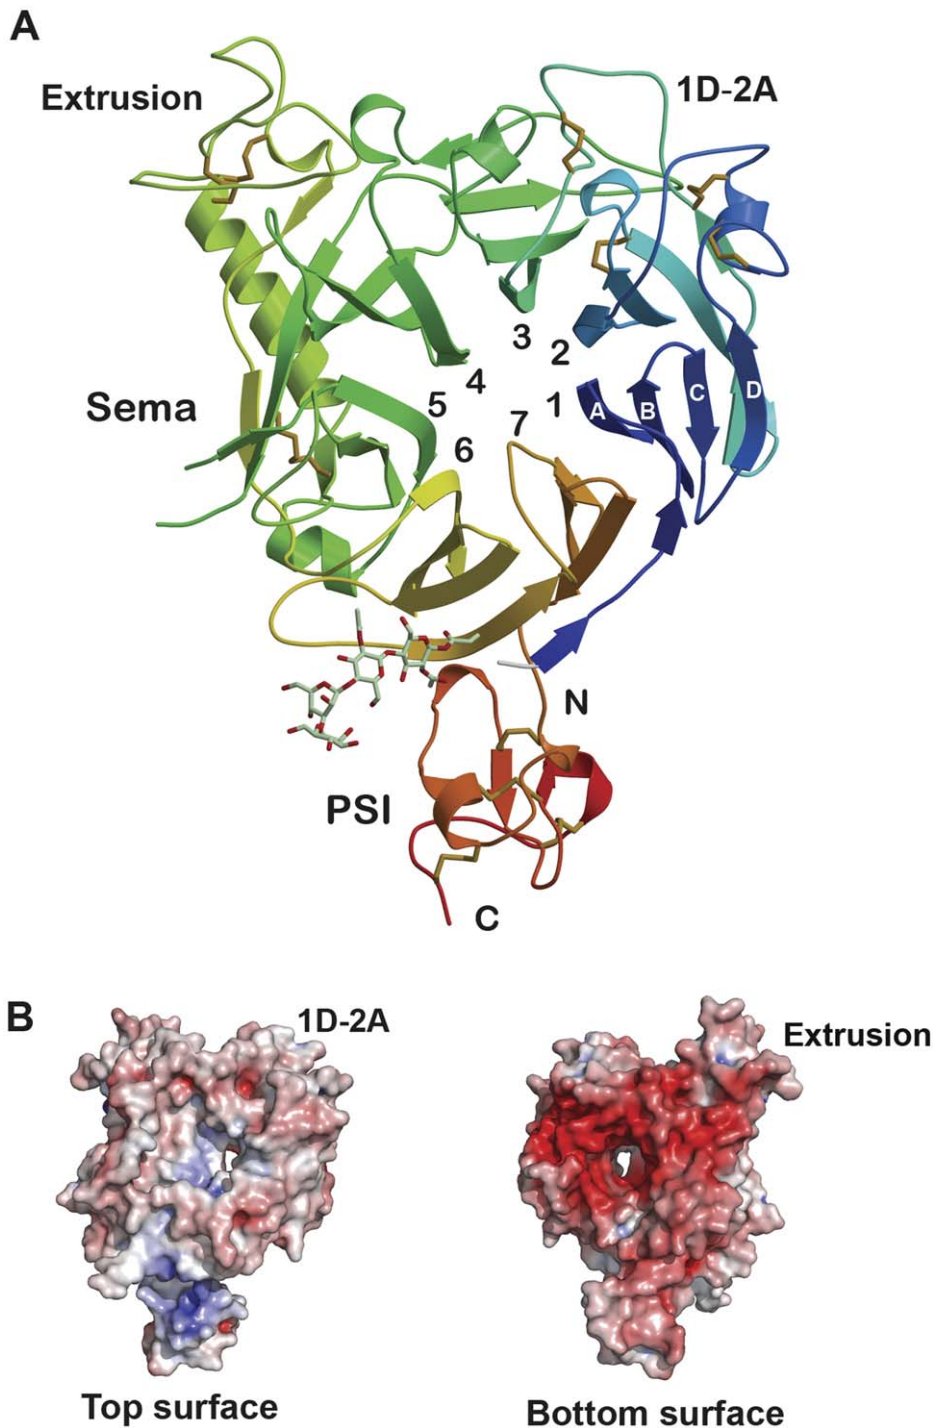

**Figure 1. Structure of the Sema-PSI domains of human RON receptor tyrosine kinase.** (A) Ribbon representation of RON Sema-PSI, viewed down the  $\beta$ -propeller, with the color ramped from blue at the N-terminus to red at the C-terminus. The blades are numbered and the antiparallel  $\beta$ -strands of each blade are labeled A–D from the inner to the outermost strands. Disulfide bonds are shown in red and the N-linked oligosaccharide is shown as stick models with the atomic color scheme: Green – carbon, red – oxygen, blue – nitrogen. (B) Surface rendering of the top and bottom surfaces of RON Sema-PSI, represented by electrostatic potential from red ( $-10 k_B T/e_c$ ) to blue ( $10 k_B T/e_c$ ), as generated by PyMol. The left panel represents the top surface using the same orientation as in (A). The right panel corresponds to the opposite or bottom  $\beta$ -propeller surface.  
doi:10.1371/journal.pone.0041912.g001

aligned but many of the surface loops adopt different conformations (Figure 3).

RON and Met Sema domains contain 15 cysteine residues that form disulfide linkages (Figure 1A, 2). Three disulfide bonds are

conserved (Cys135–Cys143, Cys300–Cys367, and Cys174–Cys177 in RON and Cys133–Cys141, Cys298–Cys363 and Cys172–Cys175 in Met). They link the intra  $\beta$ -strands 2B and 2C, the inter blade  $\beta$ -strands 4D and 5C, and a 20 residue loop

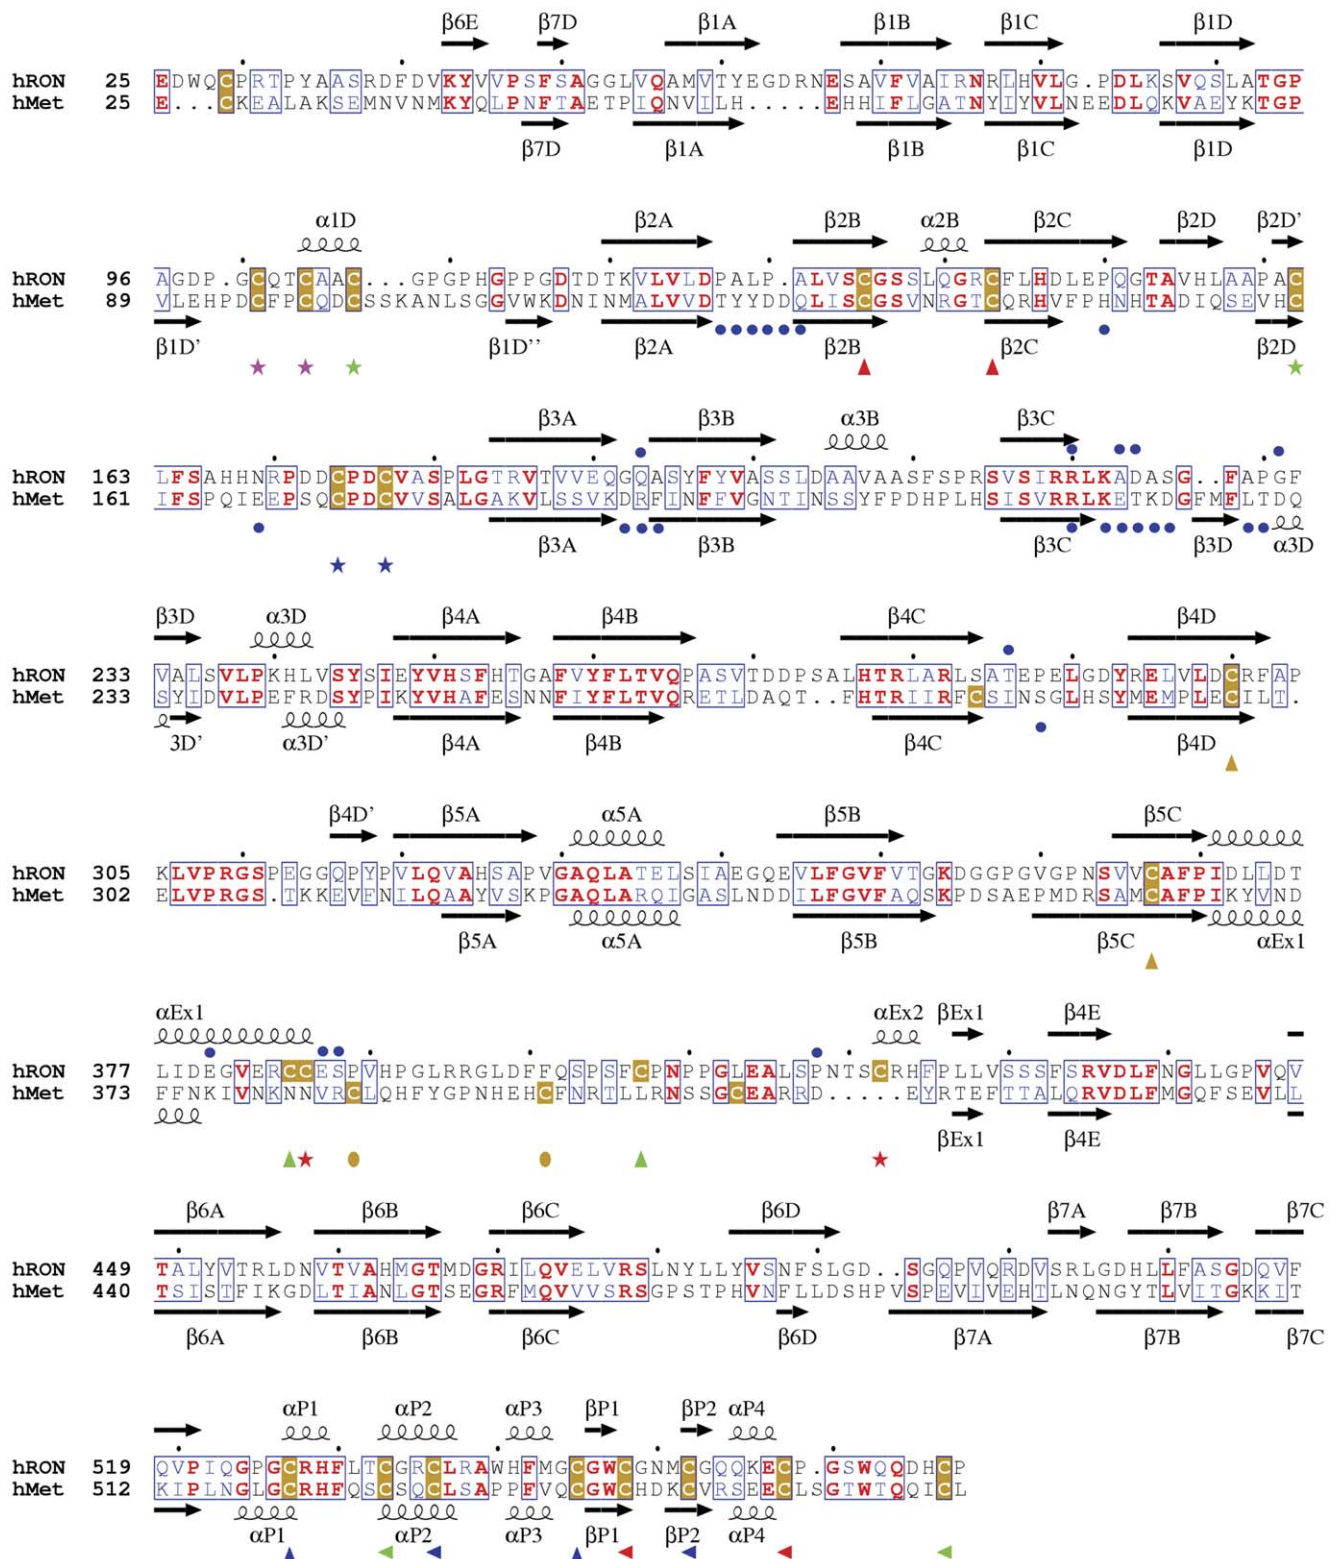

**Figure 2. Structure-based sequence alignments of human RON and Met Sema-PSI.** Residues are colored as follows: Identical residues (red), and conservatively replaced residues (blue) are boxed. Cysteines are colored gold. Matching colored symbols indicate pairs of cysteines that form disulfide bonds. Secondary structure units of RON and Met are labeled. The blue dots above the RON Sema residues indicate amino acids at the symmetry-related RON Sema-Sema interface as discussed in the text. The blue dots below the Met Sema sequence show residues that contact the HGF $\beta$  ligand (PDB code 1SHY) (Stamos et al., 2004). This figure was prepared with ESPrict ([esprict.ibcp.fr/Esprict/](http://esprict.ibcp.fr/Esprict/)). doi:10.1371/journal.pone.0041912.g002

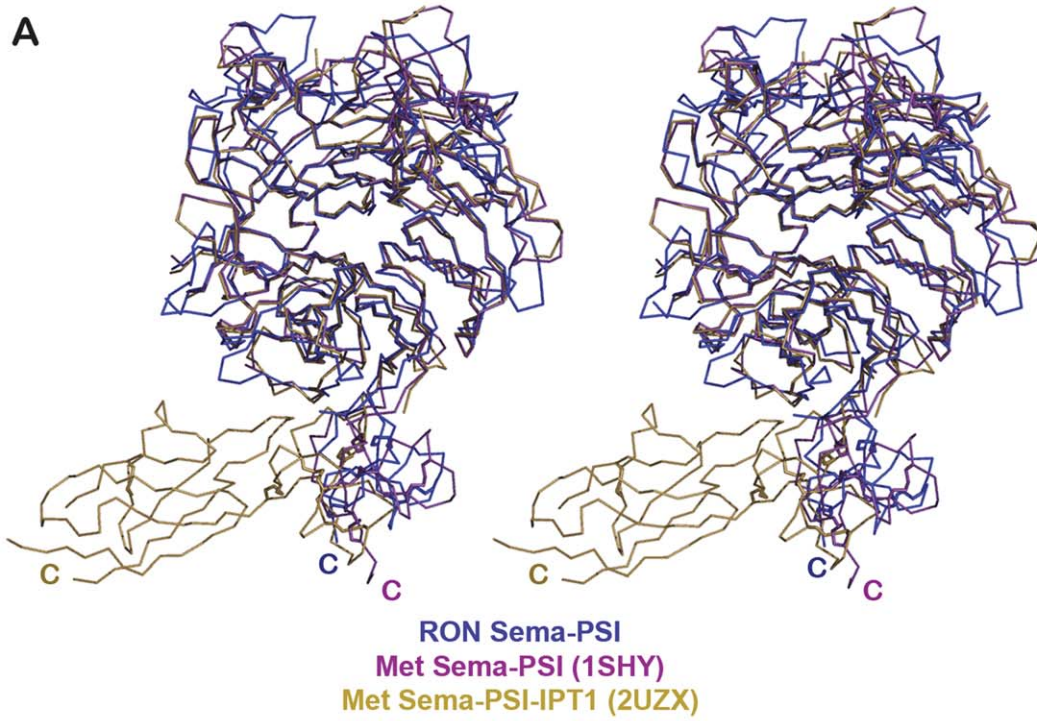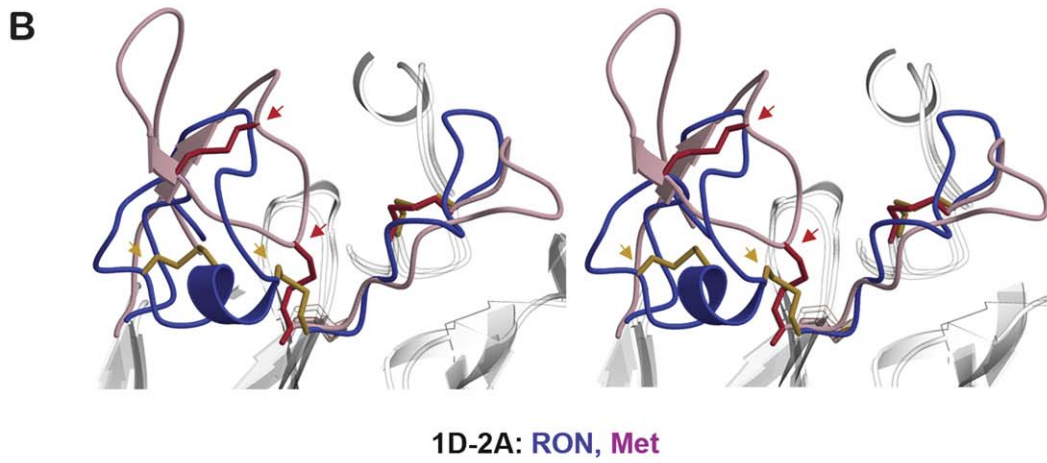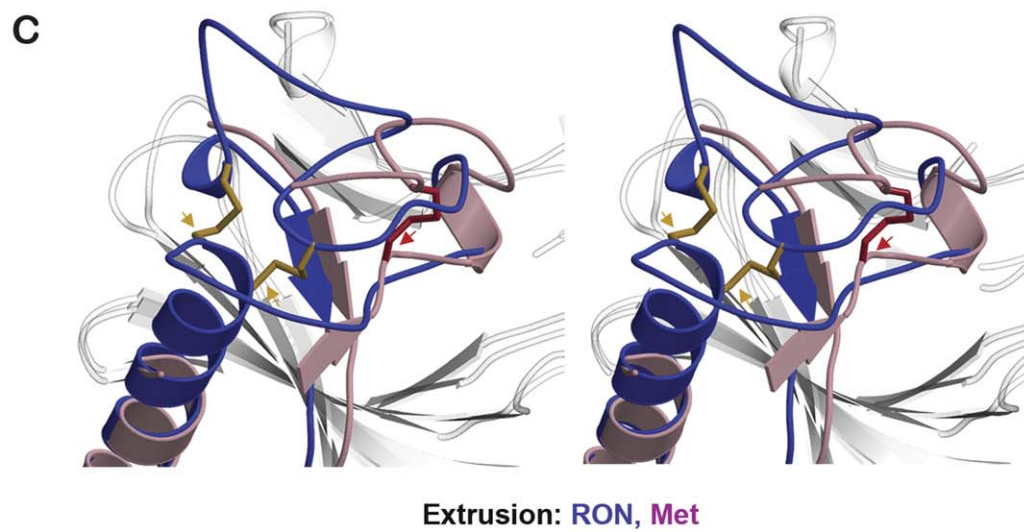

**Figure 3. Comparison of RON and Met structures.** (A) Stereoscopic representation of superposed RON Sema-PSI (blue) and Met Sema-PSI (PDB entry codes 2UZK (gold) and 1SHY (pink) structures, viewed down the  $\beta$ -propeller as in Figure 1A. The Sema domains were superposed. (B) The superposed RON and Met, highlighting the loop connecting  $\beta$ -strands 1D and 2A and (C) highlighting the extrusion regions. Disulfide bonds of RON Sema are colored gold and those of Met Sema (PDB code 1SHY), red. The gold and red arrows highlight the locations of alternative disulfide linkages in RON and Met, respectively.  
doi:10.1371/journal.pone.0041912.g003

connecting blades 2 and 3. However, four other conserved cysteine residues (Cys101, Cys104, Cys107 and Cys162 in RON Sema and Cys95, Cys98, Cys101 and Cys160 in Met Sema) form two different pairs of disulfide bonds (Figure 2, 3B). In RON, the linkages are between Cys101 and Cys104 located on the  $\alpha$ -helical turn containing loop that connects  $\beta$ -strands 1D and 2A, and between Cys107 on the same loop and Cys162 located on  $\beta$ -strand 2D (Figure 3B). Alternative disulfide pairings have been reported for the analogous Met Sema loop in the Met/HGF $\beta$  structure (Cys95–Cys101 and Cys98–Cys160), but not in the Met/InlB structure where this loop was disordered and Cys160 was unpaired [63,71]. The alternative disulfide bond and shorter 1D–2A loop of the RON Sema domain lead to a compact loop, whereas a longer loop in Met Sema lacks  $\alpha$ -helical turn and folds into a flexible loop that extended above the core of  $\beta$ -propeller (Figure 3B) (Stamos et al., 2004). One more conserved cysteine in RON and Met Sema is located near the respective N-termini (Cys29 in RON and Cys26 in Met) (Figure 2). RON Cys29 and Met Cys26 are predicted to form an interdomain disulfide bond with the conserved cysteine in IPT<sub>1</sub> domain (RON Cys590 and Met Cys584) [63]. In the RON Sema-PSI structure, Cys29 has been removed by proteolysis and Cys590 is located within the disordered RON IPT<sub>1</sub> fragment. The putative Met Cys26–Cys584 inter-domain disulfide bond was also not observed in either Met/HGF $\beta$  or Met/InlB structures [63,71].

Two more RON Sema disulfide bonds are located on the large extrusion region (Cys385–Cys407 and Cys386–Cys422). These cysteine residues are not conserved in Met Sema. Instead, the extrusion of Met Sema contains a single disulfide bond (Cys385–Cys397) and an unpaired Cys409 in the disordered loop (Figure 2 and 3C) [63,71]. Another non-conserved Cys282 in Met Sema is positioned at the end of  $\beta$ -strand 4C near the extrusion region. In all, the alternate disulfide bonding patterns in the 1D–2A loop and the extrusion regions of RON and Met Sema domains define specificity determinants, which allow RON and Met receptors to interact exclusively with either MSP or HGF, respectively.

As reported earlier, when the two available structures of Met are compared, the superposed structures of the Met/HGF $\beta$  and Met/InlB complexes reveal different orientations assumed by the Met PSI with respect to the aligned Sema domains [71]. The C-termini of the Met PSI in these structures are displaced by  $\sim 15$  Å and are rotated by  $\sim 60^\circ$  with respect to a common axis defined by the region linking the Sema and PSI domains. The RON PSI module adopts yet another orientation (Figure 3A). The RON PSI is flanked on one side by the Met PSI from the Met/HGF $\alpha$  complex with  $\sim 8$  Å displacement, and on the other side by the Met PSI from the Met/InlB complex with  $\sim 10$  Å displacement (Figure 3A). Similarly to Met, the conserved Gly524 and Gly526 located at the Sema-PSI linker region modulate the relative orientation of RON PSI (Figure 2). Moreover, both structures of Met complexes and RON Sema-PSI structure lack the disulfide bond predicted to link the disordered/degraded N-terminal region with the IPT<sub>1</sub> domain. The relative orientations of the Sema, PSI, and IPT<sub>1</sub> domains might still be different in the presence of this interdomain disulfide linkage.

The ability of RON and Met ectodomains to adopt multiple interdomain orientations may play critical roles in selective ligand

binding and receptor dimerization. For instance, the RON $\Delta$ 160 splice variant, lacking the 103 residue long IPT<sub>1</sub> domain, readily forms dimers in the absence of MSP and displays constitutive phosphorylation activity [49]. In the absence of IPT<sub>1</sub> domain, the adoptable PSI hinge may provide a mechanism for reorientation of the remaining RON ectodomains that allow MSP-independent receptor dimerization and concomitant juxtaposing of the intracellular kinase domains for autophosphorylation.

### Proteolytic Maturation

Among the semaphorin superfamily, RON and Met contain a furin protease cleavage site in a loop connecting  $\beta$ -strands 4D and 5A of Sema domain. In contrast, the semaphorins and plexin receptors lack a furin recognition site [68]. The proteolytic maturation of RON and Met are required for their signal transduction activities [4]. In addition, the lysine and arginine-rich furin cleavage site in RON has been identified as one of two consensus nuclear localization signal sequences that may play a role in the transcriptional regulatory function of RON/EGFR complex in human cancer cells [44]. We have determined the structures of single chain and thrombin-cleaved RON Sema-PSI, hoping to gain structural insight into the functional role played by this specific cleavage event. Two structures are identical within the accuracy of the data, and the loop is disordered in both cases. This suggests that the proteolytic maturation of Pro-RON into  $\alpha$  and  $\beta$  chains does not induce conformational changes in the RON Sema-PSI; rather it may be involved in MSP-induced homodimerization, and/or facilitate the weak interaction with the MSP  $\alpha$  chain. Similarly, the counterpart 9-residue surface-exposed loop of Met is disordered in Met/HGF $\beta$  and Met/InlB structures [63,71]. The equivalent 4D–5A loop without the consensus furin cleavage site in the semaphorins is involved in homodimerization, but not in plexin receptors [62,67]. Thus, the structural basis for the mechanism of proteolytic maturation, required for RON and Met receptor activation, remains unclear.

### Ligand-independent RON Dimerization

In addition to the MSP-mediated RON receptor activation, ligand-independent RON dimerization and constitutive phosphorylation activity have been observed in numerous cancer and tumor cells which over expressed full length RON receptor and expressed the RON $\Delta$ 160 splice variant [20,72,73]. RON intermolecular interactions generated by the crystal packing reveal a potential mode of ligand-independent dimerization, mediated by the Sema domain (Figure 4A). This is the most extensive crystallographic related RON Sema-Sema interface with  $\sim 960$  Å<sup>2</sup> embedded surface area, a rather large interface for typical crystal contacts [74]. Therefore, this crystal-generated interface may have a functional role at the cellular level. Multiple electrostatic interactions between the bottom surface loops of blades 3–4 and the edge residues of the extrusion region are involved, and these are repeated twice due to the crystal 2-fold symmetry axis. Two striking networks stand out within this dimer interface. First, Glu387 forms an intermolecular salt bridge with Arg220, and the carboxylate group of Glu387 also interacts with the NH of Ala223 of the neighboring molecule (Figure 4C). The guanidinium groups of Arg220 and Arg423 of the partner Sema interact with an



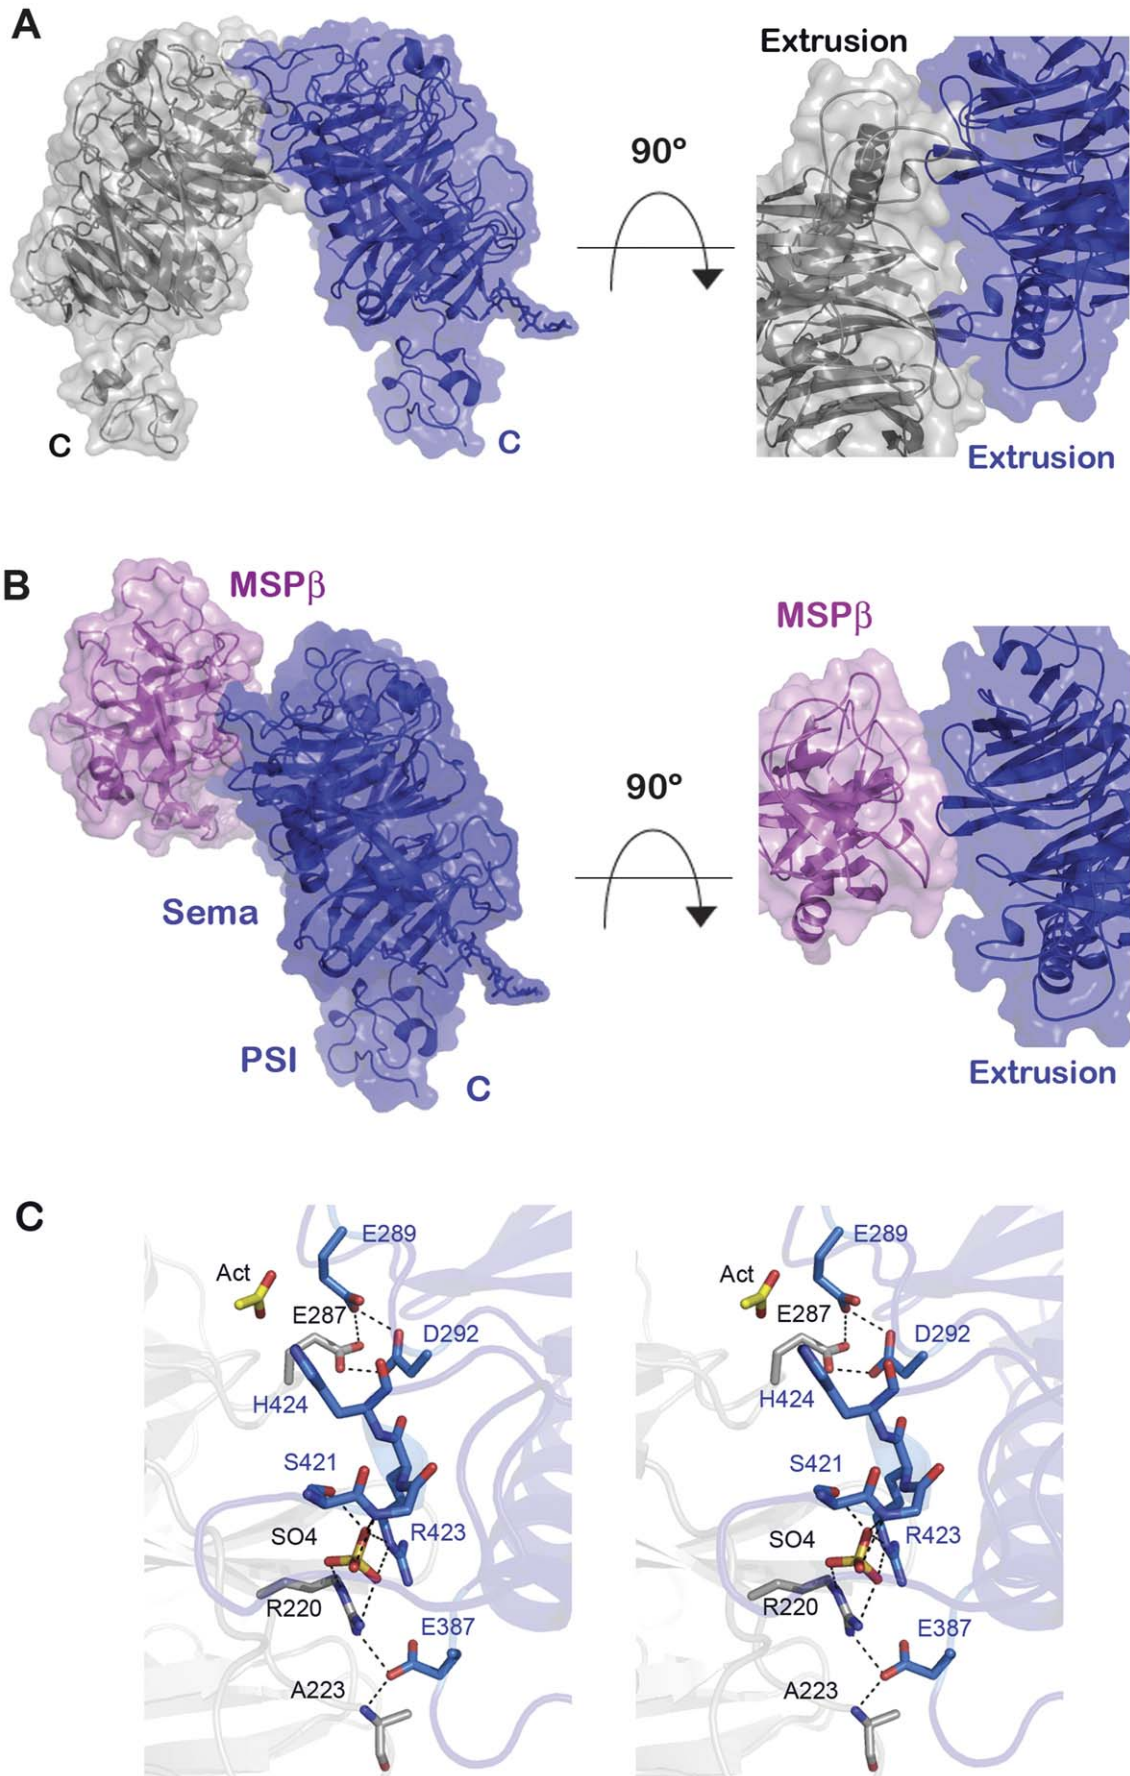

**Figure 4. Crystal packing generates a RON homodimer interface that overlaps with the putative MSP $\beta$  binding site predicted based on the Met/HGF structure.** (A) Left panel: Surface and ribbon representations of symmetry-related RON Sema-PSI molecules. Right panel: Close-up view of the interface and the molecules rotated by  $\sim 90^\circ$ . (B) Surface and ribbon representation of the modeled RON Sema-PSI/MSP $\beta$  complex derived based on the free MSP $\beta$  (PDB code 2ASU) and RON Sema-PSI structures superposed onto the structure of Met Sema-PSI/HGF $\beta$  (PDB entry 1SHY). The molecular surfaces of RON Sema-PSI (blue) and MSP $\beta$  (pink) are shown in transparent colors and secondary structural elements are shown in ribbon representation. (C) Stereoscopic representations of the RON Sema homodimer interface residues generated by crystal packing. The two subunits are colored gray and sky blue. Selected amino acids are colored in the atomic color scheme: red, oxygen; blue, nitrogen; dark yellow, sulfur; bright yellow, acetate carbon.  
doi:10.1371/journal.pone.0041912.g004

interface sulfate ion (present in the crystallization solution). The positioning of the sulfate ion is further stabilized by the hydrogen bonding with the hydroxyl group of Ser421 and by the main chain NH groups of Cys422 and Arg423. The arrangement of this sulfate-binding site appears optimal for accommodating a phosphoryl group on Ser421, although the physiological phosphorylation state of this residue is unknown.

A second intermolecular electrostatic cluster at the crystallographic RON Sema-PSI dimer interface comprises three carboxylate groups; two from one subunit (Glu289 and Asp292) and the third from the second subunit (Glu287) (Figure 4C). This particular type of proton sharing interaction between carboxyl-carboxylate groups is favorable only at pH below 6 (Sawyer and James, 1982), consistent with the acidic condition (pH 4.6) used to obtain the RON Sema-PSI crystals. Multitude secondary and tertiary shells of interactions support the formation of both electrostatic clusters. Finally, an acetate ion (pH buffering component of the crystals) is located on a special crystallographic 2-fold symmetry position, bridging two His242 imidazole groups, albeit at somewhat remote distances (3.4 Å). The pH-dependent intermolecular interactions, described above, suggest that ligand-independent homodimerization of RON may play a functional role in the acidic extracellular microenvironments often associated with tumors and under other cellular acidosis conditions [75,76].

This crystallographically observed RON Sema-PSI homodimer, generated by a Sema-Sema interface, might pertain to the mechanism of ligand-independent constitutive activity of RON $\Delta$ 160 splice variant and its inhibition by RON $\Delta$ 85 [16]. RON $\Delta$ 160, lacking the 103-residue IPT<sub>1</sub> domain, is a cell surface receptor that readily forms homodimers and is constitutively active in the absence of MSP. RON $\Delta$ 85 splice variant, on the other hand, is a soluble protein comprising only the Sema, PSI, and 64 amino acid residues of IPT<sub>1</sub> domain. The addition of RON $\Delta$ 85 reduced the levels of phosphorylated RON $\Delta$ 160 as well as those of phosphorylated downstream signaling molecules, ERK1/2 and Akt, in a dose-dependent manner [16]. The co-immunoprecipitation experiments revealed a direct association between RON $\Delta$ 160 and RON $\Delta$ 85 molecules, and RON $\Delta$ 160 dimerization was lower in cells treated with RON $\Delta$ 85 [16,20]. MSP did not prevent the RON $\Delta$ 85 inhibition; thus, the dominant negative effect appears to be a direct consequence of RON $\Delta$ 85 binding to the membrane-bound RON $\Delta$ 160 [16]. Ma and colleagues suggested the Sema-Sema interaction between RON $\Delta$ 85 and RON $\Delta$ 160 as the possible mechanism of inhibition, perhaps employing the Sema-Sema interface observed in the RON Sema-PSI structure (Figure 4A).

The full length RON also exhibits ligand-independent dimerization at high receptor density, which may be responsible for its constitutive activity in tumors [14,40,72,73]. RON $\Delta$ 90 splice variant, comprising Sema, PSI and 70 amino acids of IPT<sub>1</sub>, was shown to inhibit the MSP-induced RON phosphorylation activity and to attenuate the basal constitutive activity of RON in the absence of external MSP. RON $\Delta$ 90, found in several glioblastoma cell lines, blocked both the MSP-induced migration and random motility of these cells [14]. Analogous to the interaction between

RON $\Delta$ 85 and RON $\Delta$ 160 splice variants, we propose that RON $\Delta$ 90 splice variant may sequester the full length RON as an inactive dimer using the mode of homodimerization seen in the crystals, thus exerting an antagonistic effect on cell migration.

In this crystal homodimer, the PSI motifs extend from their respective Sema domains in the same direction as expected for membrane-anchored receptors (Figure 4A). Approximately 50 Å separates the C-termini of the PSI domains, a reasonable distance that can be bridged by the IPT domains to bring together two membrane-spanning segments so that the intracellular kinase domains can interact and undergo constitutive autophosphorylation in trans.

RON Sema domain was identified as the high affinity binding site for MSP $\beta$  [33,36]. We have mapped the high affinity MSP $\beta$  binding site on the RON Sema domain, based on the Met Sema-PSI/HGF $\beta$  structure and the structural homologies between the RON and Met receptors and their MSP and HGF ligands (Figure 4B). The model shows a region of the RON homodimer interface overlapping with a same region of RON Sema predicted to bind to MSP $\beta$ . The overlap between the binding regions lends support to our proposal that the crystallographically observed mode of RON Sema homodimerization represent the *in vivo* ligand-independent, constitutively activated RON homodimer. Similar modes of protein-protein interactions occur in the semaphorins and plexin receptors. That is, in semaphorins and plexins, the extrusion region of one Sema subunit interacts with a second homodimer subunit, or with the ligands or co-receptors [61,62,66,67]. For example, using the same interface, plexin A2 dimer undergoes a partner switch to accommodate Sema6A dimer ligand, forming a 2:2 signaling complex [62]. Although the arrangements of the RON, semaphorin, and plexin homodimers differ, all interfaces engage the extrusion region present in all Sema domains but structurally unique in each family member [62,67,69].

We note a second crystal packing interaction between symmetry-related RON Sema-PSI molecules involving a much smaller embedded surface area ( $\sim 390$  Å<sup>2</sup>), mediated by hydrophobic interactions. Top surface loops connecting  $\beta$ -strands 4E–6A, 6B–6C and 6D–7A along with the N-glycans linked to Asn488 of RON Sema participate in formation of this Sema-Sema interface (data not shown). In this homodimer arrangement, the RON PSI motifs also extend from the respective Sema domains in the same direction and their C-termini are separated by  $\sim 15$ –24 Å. The IPT domains of this dimer can make molecular contacts along the stalk of RON's ectodomain. However, this interface only formed because the N-terminus of RON Sema had undergone proteolysis. Formation of such dimer would be blocked in the presence of the N-terminal residues.

In summary, the structure of RON Sema-PSI provides new insights into the features that define the MSP $\beta$  specificity and the possible mechanism of ligand-independent RON receptor activation. Analysis of RON mode of homodimerization and comparison with the semaphorins and plexin receptors suggests that all Sema-type proteins employ homodimerization interfaces that

overlap with the ligand binding interfaces as a mechanism to regulate their signaling activities.

## References

- Ronsin C, Muscatelli F, Mattei MG, Breathnach R (1993) A novel putative receptor protein tyrosine kinase of the met family. *Oncogene* 8: 1195–1202.
- Angeloni D, Danilkovitch-Miagkova A, Ivanov SV, Breathnach R, Johnson BE, et al. (2000) Gene structure of the human receptor tyrosine kinase RON and mutation analysis in lung cancer samples. *Genes Chromosomes Cancer* 29: 147–156.
- Danilkovitch-Miagkova A, Leonard EJ (2001) Anti-apoptotic action of macrophage stimulating protein (MSP). *Apoptosis* 6: 183–190.
- Gaudino G, Follenzi A, Naldini L, Collesi C, Santoro M, et al. (1994) RON is a heterodimeric tyrosine kinase receptor activated by the HGF homologue MSP. *Embo J* 13: 3524–3532.
- Camp ER, Liu W, Fan F, Yang A, Somcio R, et al. (2005) RON, a tyrosine kinase receptor involved in tumor progression and metastasis. *Ann Surg Oncol* 12: 273–281.
- Caldwell CC, Martignoni A, Leonis MA, Ondiveeran HK, Fox-Robichaud AE, et al. (2008) Ron receptor tyrosine kinase-dependent hepatic neutrophil recruitment and survival benefit in a murine model of bacterial peritonitis. *Crit Care Med* 36: 1585–1593.
- Wang MH, Zhou YQ, Chen YQ (2002) Macrophage-stimulating protein and RON receptor tyrosine kinase: potential regulators of macrophage inflammatory activities. *Scand J Immunol* 56: 545–553.
- Wilson CB, Ray M, Lutz M, Sharda D, Xu J, et al. (2008) The RON receptor tyrosine kinase regulates IFN-gamma production and responses in innate immunity. *J Immunol* 181: 2303–2310.
- Goyette P, Lefebvre C, Ng A, Brant SR, Cho JH, et al. (2008) Gene-centric association mapping of chromosome 3p implicates MST1 in IBD pathogenesis. *Mucosal Immunol* 1: 131–138.
- Hirayama I, Ide M, Asao T, Kuwano H (2007) Receptor protein tyrosine kinase Ron is highly expressed in colorectal mucosa of ulcerative colitis patients. *Hepatogastroenterology* 54: 1672–1675.
- Matsuzaki S, Canis M, Pouly JL, Dechelotte P, Okamura K, et al. (2005) The macrophage stimulating protein/RON system: a potential novel target for prevention and treatment of endometriosis. *Mol Hum Reprod* 11: 345–349.
- Bardella C, Costa B, Maggiora P, Patane S, Olivero M, et al. (2004) Truncated RON tyrosine kinase drives tumor cell progression and abrogates cell-cell adhesion through E-cadherin transcriptional repression. *Cancer Res* 64: 5154–5161.
- Collesi C, Santoro MM, Gaudino G, Comoglio PM (1996) A splicing variant of the RON transcript induces constitutive tyrosine kinase activity and an invasive phenotype. *Mol Cell Biol* 16: 5518–5526.
- Eckerich C, Schulte A, Martens T, Zapf S, Westphal M, et al. (2009) RON receptor tyrosine kinase in human gliomas: expression, function, and identification of a novel soluble splice variant. *J Neurochem* 109: 969–980.
- Lu Y, Yao HP, Wang MH (2007) Multiple variants of the RON receptor tyrosine kinase: biochemical properties, tumorigenic activities, and potential drug targets. *Cancer Lett* 257: 157–164.
- Ma Q, Zhang K, Yao HP, Zhou YQ, Padhye S, et al. (2010) Inhibition of MSP-RON signaling pathway in cancer cells by a novel soluble form of RON comprising the entire sema sequence. *Int J Oncol* 36: 1551–1561.
- Thobe MN, Gurusamy D, Pathrose P, Waltz SE (2010) The Ron receptor tyrosine kinase positively regulates angiogenic chemokine production in prostate cancer cells. *Oncogene* 29: 214–226.
- Thomas RM, Toney K, Fenoglio-Preiser C, Revelo-Penafiel MP, Hingorani SR, et al. (2007) The RON receptor tyrosine kinase mediates oncogenic phenotypes in pancreatic cancer cells and is increasingly expressed during pancreatic cancer progression. *Cancer Res* 67: 6075–6082.
- Wang MH, Lao WF, Wang D, Luo YL, Yao HP (2007) Blocking tumorigenic activities of colorectal cancer cells by a splicing RON receptor variant defective in the tyrosine kinase domain. *Cancer Biol Ther* 6: 1121–1129.
- Zhou YQ, He C, Chen YQ, Wang D, Wang MH (2003) Altered expression of the RON receptor tyrosine kinase in primary human colorectal adenocarcinomas: generation of different splicing RON variants and their oncogenic potential. *Oncogene* 22: 186–197.
- Dussault I, Bellon SF (2009) From concept to reality: the long road to c-Met and RON receptor tyrosine kinase inhibitors for the treatment of cancer. *Anticancer Agents Med Chem* 9: 221–229.
- Guin S, Yao HP, Wang MH (2010) RON receptor tyrosine kinase as a target for delivery of chemodrugs by antibody directed pathway for cancer cell cytotoxicity. *Mol Pharm* 7: 386–397.
- Wagh PK, Peace BE, Waltz SE (2008) Met-related receptor tyrosine kinase Ron in tumor growth and metastasis. *Adv Cancer Res* 100: 1–33.
- Miller M, Leonard EJ (1998) Mode of receptor binding and activation by plasminogen-related growth factors. *FEBS Lett* 429: 1–3.
- Wang MH, Ronsin C, Gesnel MC, Coupey L, Skeel A, et al. (1994) Identification of the ron gene product as the receptor for the human macrophage stimulating protein. *Science* 266: 117–119.
- Wang J, Rajput A, Kan JL, Rose R, Liu XQ, et al. (2009) Knockdown of Ron kinase inhibits mutant phosphatidylinositol 3-kinase and reduces metastasis in human colon carcinoma. *J Biol Chem* 284: 10912–10922.
- Leonard EJ, Skeel A (1976) A serum protein that stimulates macrophage movement, chemotaxis and spreading. *Experimental cell research* 102: 434–438.
- Wang MH, Julian FM, Breathnach R, Godowski PJ, Takehara T, et al. (1997) Macrophage stimulating protein (MSP) binds to its receptor via the MSP beta chain. *J Biol Chem* 272: 16999–17004.
- Bhatt AS, Welm A, Farady CJ, Vasquez M, Wilson K, et al. (2007) Coordinate expression and functional profiling identify an extracellular proteolytic signaling pathway. *Proc Natl Acad Sci U S A* 104: 5771–5776.
- Ganesan R, Kolumam GA, Lin SJ, Xie MH, Santell L, et al. (2011) Proteolytic activation of pro-macrophage-stimulating protein by hepsin. *Mol Cancer Res* 9: 1175–1186.
- Donate LE, Gherardi E, Srinivasan N, Sowdhamini R, Aparicio S, et al. (1994) Molecular evolution and domain structure of plasminogen-related growth factors (HGF/SF and HGF1/MSP). *Protein Sci* 3: 2378–2394.
- Skeel A, Yoshimura T, Showalter SD, Tanaka S, Appella E, et al. (1991) Macrophage stimulating protein: purification, partial amino acid sequence, and cellular activity. *J Exp Med* 173: 1227–1234.
- Danilkovitch A, Miller M, Leonard EJ (1999) Interaction of macrophage-stimulating protein with its receptor. Residues critical for beta chain binding and evidence for independent alpha chain binding. *J Biol Chem* 274: 29937–29943.
- Waltz SE, McDowell SA, Muraoka RS, Air EL, Flick LM, et al. (1997) Functional characterization of domains contained in hepatocyte growth factor-like protein. *J Biol Chem* 272: 30526–30537.
- Gorlatova N, Chao K, Pal LR, Araj RH, Galkin A, et al. (2011) Protein characterization of a candidate mechanism SNP for Crohn's disease: the macrophage stimulating protein R689C substitution. *PLoS one* 6: e27269.
- Angeloni D, Danilkovitch-Miagkova A, Miagkov A, Leonard EJ, Lerman MI (2004) The soluble sema domain of the RON receptor inhibits macrophage-stimulating protein-induced receptor activation. *J Biol Chem* 279: 3726–3732.
- Chen Q, Seol DW, Carr B, Zarnegar R (1997) Co-expression and regulation of Met and Ron proto-oncogenes in human hepatocellular carcinoma tissues and cell lines. *Hepatology* 26: 59–66.
- Corrotto P, Corso S, Gamberini S, Comoglio PM, Giordano S (2004) Interplay between scatter factor receptors and B plexins controls invasive growth. *Oncogene* 23: 5131–5137.
- Danilkovitch-Miagkova A, Angeloni D, Skeel A, Donley S, Lerman M, et al. (2000) Integrin-mediated RON growth factor receptor phosphorylation requires tyrosine kinase activity of both the receptor and c-Src. *J Biol Chem* 275: 14783–14786.
- Follenzi A, Bakovic S, Gual P, Stella MC, Longati P, et al. (2000) Cross-talk between the proto-oncogenes Met and Ron. *Oncogene* 19: 3041–3049.
- Hsu PY, Liu HS, Cheng HL, Tzai TS, Guo HR, et al. (2006) Collaboration of RON and epidermal growth factor receptor in human bladder carcinogenesis. *J Urol* 176: 2262–2267.
- Jo M, Stolz DB, Esplen JE, Dorko K, Michalopoulos GK, et al. (2000) Cross-talk between epidermal growth factor receptor and c-Met signal pathways in transformed cells. *J Biol Chem* 275: 8806–8811.
- Wang MH, Wang D, Chen YQ (2003) Oncogenic and invasive potentials of human macrophage-stimulating protein receptor, the RON receptor tyrosine kinase. *Carcinogenesis* 24: 1291–1300.
- Liu HS, Hsu PY, Lai MD, Chang HY, Ho CL, et al. (2010) An unusual function of RON receptor tyrosine kinase as a transcriptional regulator in cooperation with EGFR in human cancer cells. *Carcinogenesis* 31: 1456–1464.
- Danilkovitch-Miagkova A, Duh FM, Kuzmin I, Angeloni D, Liu SL, et al. (2003) Hyaluronidase 2 negatively regulates RON receptor tyrosine kinase and mediates transformation of epithelial cells by jaagsiekte sheep retrovirus. *Proceedings of the National Academy of Sciences of the United States of America* 100: 4580–4585.
- Liu SL, Miller AD (2005) Transformation of madin-darby canine kidney epithelial cells by sheep retrovirus envelope proteins. *Journal of virology* 79: 927–933.
- Manzanares D, Monzon ME, Savani RC, Salathe M (2007) Apical oxidative hyaluronan degradation stimulates airway ciliary beating via RHAMM and RON. *Am J Respir Cell Mol Biol* 37: 160–168.
- Matzke A, Herrlich P, Ponta H, Orian-Rousseau V (2005) A five-amino-acid peptide blocks Met- and Ron-dependent cell migration. *Cancer Res* 65: 6105–6110.
- Ma Q, Zhang K, Guin S, Zhou YQ, Wang MH (2010) Deletion or insertion in the first immunoglobulin-plexin-transcription (IPT) domain differentially

## Author Contributions

Conceived and designed the experiments: KLC OH. Performed the experiments: KLC CC. Analyzed the data: KLC OH. Contributed reagents/materials/analysis tools: KLC IWT. Wrote the paper: KLC OH.

- regulates expression and tumorigenic activities of RON receptor Tyrosine Kinase. *Mol Cancer* 9: 307.
50. Kim YK, Shin HS, Tomiya N, Lee YC, Betenbaugh MJ, et al. (2005) Production and N-glycan analysis of secreted human erythropoietin glycoprotein in stably transfected *Drosophila* S2 cells. *Biotechnol Bioeng* 92: 452–461.
  51. Kabsch W (2010) Xds. *Acta Crystallogr D Biol Crystallogr* 66: 125–132.
  52. Pflugrath JW (1999) The finer things in X-ray diffraction data collection. *Acta Crystallogr D Biol Crystallogr* 55: 1718–1725.
  53. McCoy AJ, Grosse-Kunstleve RW, Adams PD, Winn MD, Storoni LC, et al. (2007) Phaser crystallographic software. *Journal of applied crystallography* 40: 658–674.
  54. Winn MD, Isupov MN, Murshudov GN (2001) Use of TLS parameters to model anisotropic displacements in macromolecular refinement. *Acta Crystallogr D Biol Crystallogr* 57: 122–133.
  55. Emsley P, Lohkamp B, Scott WG, Cowtan K (2010) Features and development of Coot. *Acta Crystallogr D Biol Crystallogr* 66: 486–501.
  56. Murshudov GN, Vagin AA, Dodson EJ (1997) Refinement of macromolecular structures by the maximum-likelihood methods. *Acta Crystallogr D* 53: 240–255.
  57. Krissinel E, Henrick K (2007) Inference of macromolecular assemblies from crystalline state. *J Mol Biol* 372: 774–797.
  58. Kraulis PJ (1991) A program to produce both detailed and schematic plots of protein structures. *J Appl Crystallogr* 24: 946–950.
  59. Merritt EA, Bacon DJ (1997) Raster3D: Photorealistic molecular graphics. *Methods Enzymol* 277: 505–524.
  60. Kocks C, Maehr R, Overkleeft HS, Wang EW, Iyer LK, et al. (2003) Functional proteomics of the active cysteine protease content in *Drosophila* S2 cells. *Mol Cell Proteomics* 2: 1188–1197.
  61. Liu H, Juo ZS, Shim AH, Focia PJ, Chen X, et al. (2010) Structural basis of semaphorin-plexin recognition and viral mimicry from Sema7A and A39R complexes with PlexinC1. *Cell* 142: 749–761.
  62. Nogi T, Yasui N, Mihara E, Matsunaga Y, Noda M, et al. (2010) Structural basis for semaphorin signalling through the plexin receptor. *Nature* 467: 1123–1127.
  63. Stamos J, Lazarus RA, Yao X, Kirchhofer D, Wiesmann C (2004) Crystal structure of the HGF beta-chain in complex with the Sema domain of the Met receptor. *Embo J* 23: 2325–2335.
  64. Holm L, Rosenstrom P (2010) Dali server: conservation mapping in 3D. *Nucleic Acids Res* 38: W545–549.
  65. Holm L, Sander C (1995) Dali: a network tool for protein structure comparison. *Trends in biochemical sciences* 20: 478–480.
  66. Janssen BJ, Robinson RA, Perez-Branguli F, Bell CH, Mitchell KJ, et al. (2010) Structural basis of semaphorin-plexin signalling. *Nature* 467: 1118–1122.
  67. Antipenko A, Himanen JP, van Leyen K, Nardi-Dei V, Lesniak J, et al. (2003) Structure of the semaphorin-3A receptor binding module. *Neuron* 39: 589–598.
  68. Gherardi E, Love CA, Esnouf RM, Jones EY (2004) The sema domain. *Curr Opin Struct Biol* 14: 669–678.
  69. Love CA, Harlos K, Mavaddat N, Davis SJ, Stuart DI, et al. (2003) The ligand-binding face of the semaphorins revealed by the high-resolution crystal structure of SEMA4D. *Nat Struct Biol* 10: 843–848.
  70. Kozlov G, Perreault A, Schrag JD, Park M, Cygler M, et al. (2004) Insights into function of PSI domains from structure of the Met receptor PSI domain. *Biochem Biophys Res Commun* 321: 234–240.
  71. Niemann HH, Jager V, Butler PJ, van den Heuvel J, Schmidt S, et al. (2007) Structure of the human receptor tyrosine kinase met in complex with the *Listeria* invasion protein InIB. *Cell* 130: 235–246.
  72. Varela M, Chow YH, Sturkie C, Murcia P, Palmarini M (2006) Association of RON tyrosine kinase with the Jaagsiekte sheep retrovirus envelope glycoprotein. *Virology* 350: 347–357.
  73. Wei X, Ni S, Correll PH (2005) Uncoupling ligand-dependent and -independent mechanisms for mitogen-activated protein kinase activation by the murine Ron receptor tyrosine kinase. *The Journal of biological chemistry* 280: 35098–35107.
  74. Carugo O, Argos P (1997) Protein-protein crystal-packing contacts. *Protein Sci* 6: 2261–2263.
  75. Chiche J, Brahimi-Horn MC, Pouyssegur J (2010) Tumour hypoxia induces a metabolic shift causing acidosis: a common feature in cancer. *Journal of cellular and molecular medicine* 14: 771–794.
  76. Vaupel P, Kallinowski F, Okunieff P (1989) Blood flow, oxygen and nutrient supply, and metabolic microenvironment of human tumors: a review. *Cancer Res* 49: 6449–6465.
